# Supplementary material
Source: MDPI journal article supplement (https://www.mdpi.com/2410-3888/8/12/608)
Supplement: s1 [file s1]

Archive with 2 entries (2 files):
- Figure S1.tif
- fishes-2714347-supplementary.pdf
